# Supplementary material
Source: MDPI journal article supplement (https://www.mdpi.com/2075-163X/10/7/637)
Supplement: s1 [file s1]

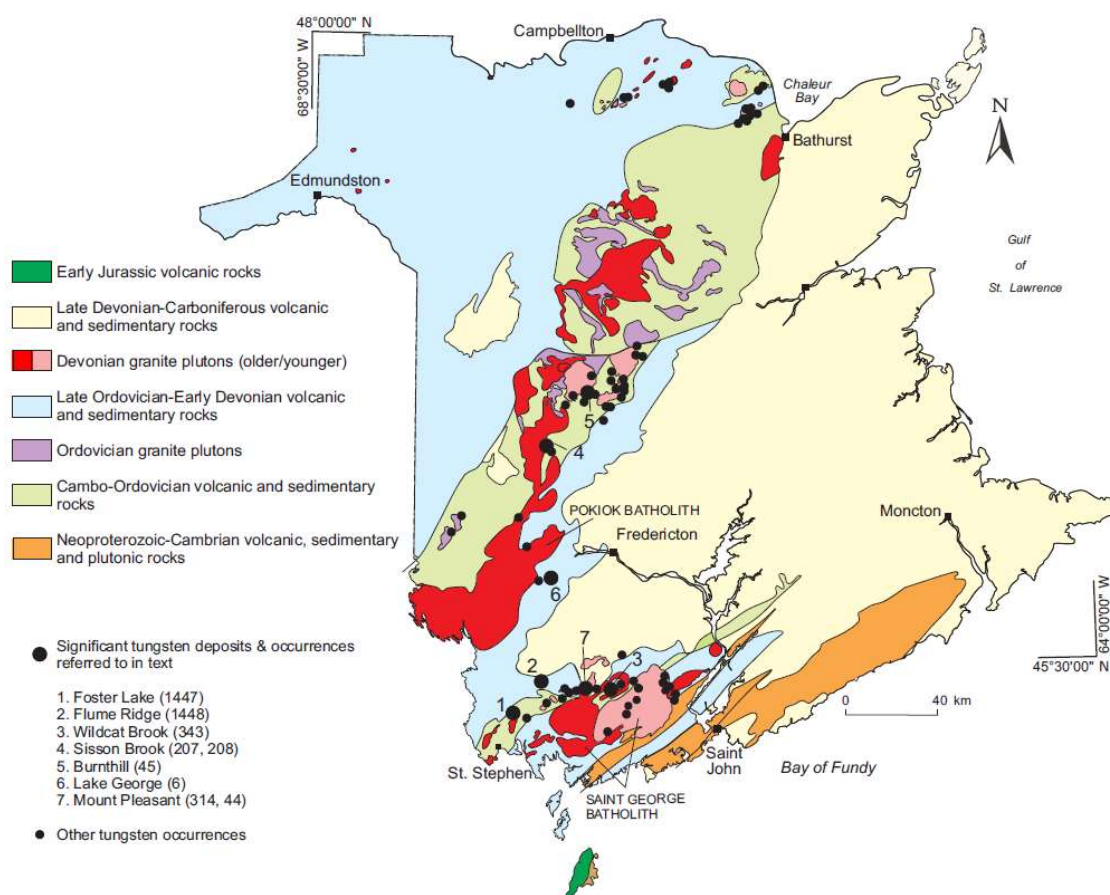

**Supplementary Figure S1.** Geology and location of tungsten occurrences in New Brunswick. Numbers in brackets correspond with New Brunswick mineral occurrence database unique reference number (<http://dnr-mrn.gnb.ca/mineraloccurrence/>). From Stewart et al. [17].

**Supplementary Table ST1.** Whole rock geochemistry included as Excel file titled “Supplementary\_Table\_ST1.xlsx”

**Supplementary Table ST2.** Extended laser ablation data from the analysis of titanite in sample from drill core SB0806 at 63.7m (summary presented in Table 2).

| Comments       | Used for Age Calculation | U<br>(ppm)* | Th<br>(ppm)* | <sup>204</sup> Pb cps | <sup>206</sup> Pb<br><sup>204</sup> Pb | <sup>207</sup> Pb<br><sup>235</sup> U | 2σ    | <sup>206</sup> Pb<br><sup>238</sup> U | 2σ     | err.<br>cor. | <sup>207</sup> Pb<br><sup>206</sup> Pb | 2σ     | <sup>207</sup> Pb<br><sup>235</sup> U<br>Age | 2σ | <sup>206</sup> Pb<br><sup>238</sup> U<br>Age | 2σ  | % conc |
|----------------|--------------------------|-------------|--------------|-----------------------|----------------------------------------|---------------------------------------|-------|---------------------------------------|--------|--------------|----------------------------------------|--------|----------------------------------------------|----|----------------------------------------------|-----|--------|
| 63.7m_ttn3c    |                          | 273         | 538          | 54                    | 811                                    | 0.514                                 | 0.057 | 0.0678                                | 0.0012 | 0.58         | 0.0526                                 | 0.0057 | 417                                          | 38 | 422.9                                        | 7.3 | 101.4  |
| 63.7m_ttn2r    |                          | 281         | 612          | 99                    | 466                                    | 0.452                                 | 0.052 | 0.0679                                | 0.0013 | 0.68         | 0.0477                                 | 0.0054 | 396                                          | 35 | 423.5                                        | 7.8 | 106.9  |
| 63.7m_ttn8r-2  |                          | 226         | 726          | 103                   | 368                                    | 0.460                                 | 0.059 | 0.0689                                | 0.0015 | 0.79         | 0.0493                                 | 0.0058 | 399                                          | 41 | 429.8                                        | 9.4 | 107.7  |
| 63.7m_tt5c     |                          | 277         | 652          | 101                   | 463                                    | 0.479                                 | 0.056 | 0.0694                                | 0.0013 | 0.67         | 0.0488                                 | 0.0055 | 390                                          | 41 | 432.2                                        | 7.6 | 110.8  |
| 63.7m_ttn1r    |                          | 261         | 729          | 96                    | 449                                    | 0.499                                 | 0.060 | 0.0681                                | 0.0014 | 0.66         | 0.0523                                 | 0.0058 | 405                                          | 41 | 424.6                                        | 8.3 | 104.8  |
| 63.7m_ttn6r-5  | yes                      | 334         | 935          | 89                    | 621                                    | 0.502                                 | 0.062 | 0.0696                                | 0.0014 | 0.69         | 0.0522                                 | 0.0061 | 425                                          | 42 | 433.6                                        | 8.5 | 102.0  |
| 63.7m_ttn4r-3  | yes                      | 233         | 605          | 87                    | 448                                    | 0.515                                 | 0.067 | 0.0693                                | 0.0016 | 0.83         | 0.0533                                 | 0.0063 | 425                                          | 45 | 432.1                                        | 9.7 | 101.7  |
| 63.7m_ttn5r-2  | yes                      | 292         | 1049         | 121                   | 421                                    | 0.516                                 | 0.052 | 0.0688                                | 0.0011 | 0.56         | 0.0544                                 | 0.0053 | 413                                          | 37 | 428.8                                        | 6.8 | 103.8  |
| 63.7m_ttn4r    | yes                      | 164         | 437          | 82                    | 341                                    | 0.519                                 | 0.086 | 0.0685                                | 0.0016 | 0.76         | 0.0544                                 | 0.0083 | 407                                          | 61 | 427.0                                        | 9.8 | 104.9  |
| 63.7m_ttn6r-3  | yes                      | 362         | 913          | 93                    | 640                                    | 0.522                                 | 0.050 | 0.0690                                | 0.0014 | 0.72         | 0.0547                                 | 0.0049 | 432                                          | 34 | 429.8                                        | 8.5 | 99.5   |
| 63.7m_ttn2c    | yes                      | 284         | 742          | 71                    | 655                                    | 0.527                                 | 0.051 | 0.0689                                | 0.0013 | 0.63         | 0.0536                                 | 0.0050 | 418                                          | 35 | 429.2                                        | 7.6 | 102.7  |
| 63.7m_ttn3r    | yes                      | 248         | 686          | 75                    | 551                                    | 0.528                                 | 0.058 | 0.0697                                | 0.0015 | 0.74         | 0.0547                                 | 0.0055 | 424                                          | 41 | 434.6                                        | 9.1 | 102.5  |
| 63.7m_ttn4c    | yes                      | 249         | 884          | 85                    | 504                                    | 0.529                                 | 0.069 | 0.0698                                | 0.0015 | 0.76         | 0.0538                                 | 0.0068 | 434                                          | 48 | 435.1                                        | 9.0 | 100.3  |
| 63.7m_ttn5r    | yes                      | 240         | 623          | 83                    | 487                                    | 0.530                                 | 0.073 | 0.0697                                | 0.0014 | 0.72         | 0.0531                                 | 0.0071 | 423                                          | 52 | 434.3                                        | 8.6 | 102.7  |
| 63.7m_ttn6c    | yes                      | 342         | 834          | 68                    | 814                                    | 0.532                                 | 0.046 | 0.0685                                | 0.0014 | 0.69         | 0.0554                                 | 0.0044 | 434                                          | 31 | 427.2                                        | 8.6 | 98.4   |
| 63.7mttn1c     | yes                      | 295         | 836          | 74                    | 679                                    | 0.532                                 | 0.050 | 0.0700                                | 0.0014 | 0.66         | 0.0540                                 | 0.0047 | 426                                          | 34 | 436.1                                        | 8.4 | 102.4  |
| 63.7m_ttn11r   | yes                      | 392         | 843          | 78                    | 817                                    | 0.534                                 | 0.039 | 0.0690                                | 0.0013 | 0.68         | 0.0565                                 | 0.0036 | 436                                          | 26 | 430.1                                        | 7.8 | 98.6   |
| 63.7m_ttn9r-2  | yes                      | 261         | 722          | 70                    | 613                                    | 0.534                                 | 0.060 | 0.0700                                | 0.0015 | 0.72         | 0.0534                                 | 0.0057 | 433                                          | 40 | 436.0                                        | 9.1 | 100.7  |
| 63.7m_ttn7r    | yes                      | 256         | 800          | 88                    | 475                                    | 0.536                                 | 0.054 | 0.0697                                | 0.0013 | 0.56         | 0.0545                                 | 0.0055 | 438                                          | 37 | 434.3                                        | 7.6 | 99.2   |
| 63.6m_ttn6r    | yes                      | 189         | 525          | 77                    | 405                                    | 0.537                                 | 0.088 | 0.0688                                | 0.0016 | 0.78         | 0.0535                                 | 0.0090 | 410                                          | 64 | 428.8                                        | 9.8 | 104.6  |
| 63.7_ttn8c     |                          | 206         | 438          | 60                    | 574                                    | 0.539                                 | 0.068 | 0.0700                                | 0.0015 | 0.75         | 0.0551                                 | 0.0063 | 429                                          | 47 | 435.9                                        | 8.7 | 101.6  |
| 63.7m_ttn6r-2  |                          | 313         | 1193         | 84                    | 608                                    | 0.540                                 | 0.052 | 0.0692                                | 0.0014 | 0.68         | 0.0558                                 | 0.0050 | 434                                          | 35 | 431.5                                        | 8.3 | 99.4   |
| 63.7m_ttn10c   |                          | 257         | 555          | 53                    | 789                                    | 0.569                                 | 0.051 | 0.0697                                | 0.0012 | 0.70         | 0.0598                                 | 0.0051 | 462                                          | 34 | 434.2                                        | 7.4 | 94.0   |
| 63.7m_ttn8r-1  |                          | 202         | 426          | 44                    | 753                                    | 0.604                                 | 0.070 | 0.0691                                | 0.0016 | 0.78         | 0.0623                                 | 0.0065 | 485                                          | 44 | 430.9                                        | 9.5 | 88.8   |
| 63.7m_ttn11r-2 |                          | 274         | 680          | 75                    | 608                                    | 0.532                                 | 0.049 | 0.0701                                | 0.0012 | 0.56         | 0.0547                                 | 0.0047 | 424                                          | 33 | 436.8                                        | 7.2 | 103.0  |
| 63.7m_ttn4r-2  |                          | 306         | 886          | 80                    | 631                                    | 0.540                                 | 0.049 | 0.0701                                | 0.0013 | 0.67         | 0.0549                                 | 0.0046 | 434                                          | 32 | 436.9                                        | 8.0 | 100.7  |
| 63.7m_ttn11r-3 |                          | 251         | 593          | 82                    | 499                                    | 0.533                                 | 0.056 | 0.0703                                | 0.0012 | 0.71         | 0.0546                                 | 0.0058 | 432                                          | 40 | 437.7                                        | 7.3 | 101.3  |
| 63.7m_ttn9r    |                          | 342         | 853          | 81                    | 693                                    | 0.541                                 | 0.046 | 0.0703                                | 0.0013 | 0.72         | 0.0543                                 | 0.0043 | 433                                          | 30 | 438.2                                        | 7.9 | 101.2  |
| 63.7m_ttn6r-4  |                          | 274         | 534          | 65                    | 702                                    | 0.534                                 | 0.054 | 0.0703                                | 0.0014 | 0.76         | 0.0546                                 | 0.0049 | 428                                          | 35 | 437.8                                        | 8.7 | 102.3  |
| 63.7m_ttn7c    |                          | 325         | 707          | 89                    | 604                                    | 0.598                                 | 0.052 | 0.0703                                | 0.0011 | 0.67         | 0.0603                                 | 0.0052 | 468                                          | 35 | 438.1                                        | 6.6 | 93.6   |
| 63.7m_ttn7r-3  |                          | 253         | 569          | 61                    | 694                                    | 0.542                                 | 0.055 | 0.0709                                | 0.0015 | 0.75         | 0.0541                                 | 0.0052 | 431                                          | 38 | 441.3                                        | 9.2 | 102.4  |

\*U and Th concentrations are semi-quantitative.
